# Supplementary figures and images for: Pathological Pattern of Intrahepatic HBV in HCC is Phenocopied by PDX-Derived Mice: a Novel Model for Antiviral Treatment
Source: PubMed Central journal article supplement — Transl Oncol. 2019 Jun 12;12(9):1138–46. doi: 10.1016/j.tranon.2019.05.006 (PMC6581976; doi:10.1016/j.tranon.2019.05.006), 2019-06-12

9# Cancer tissue

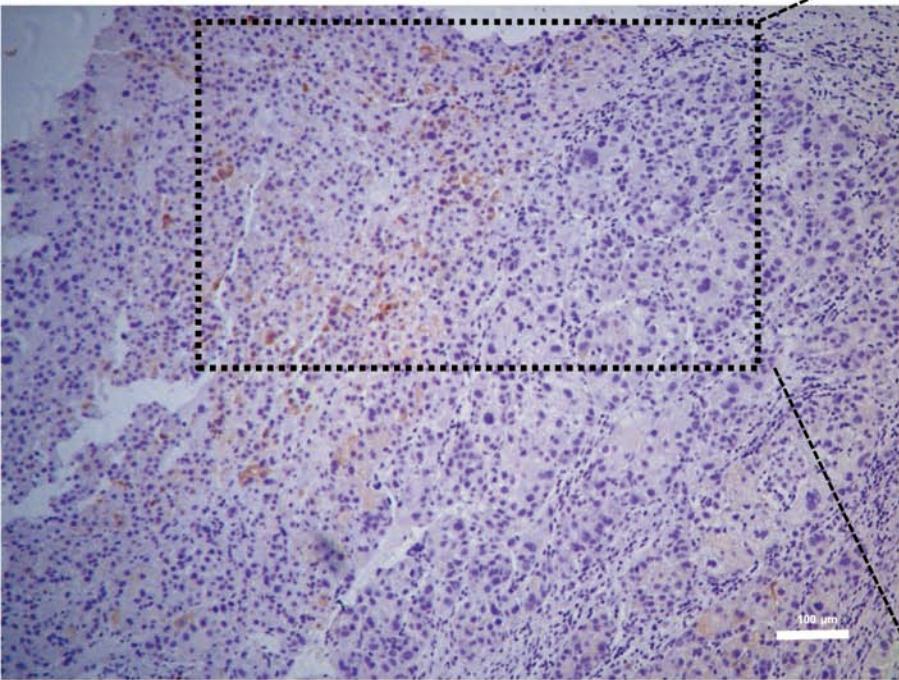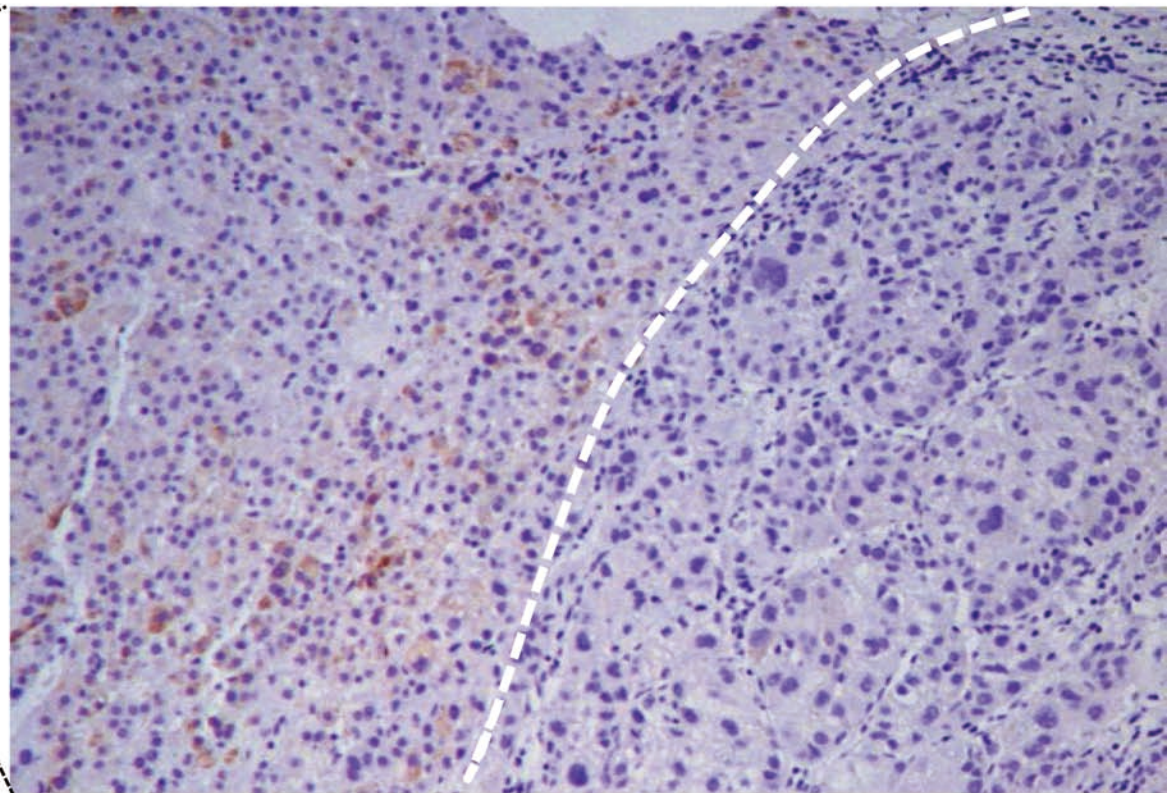

Supplement: mmc1.pdf [file mmc1.pdf]

## 2# Stroma tissue

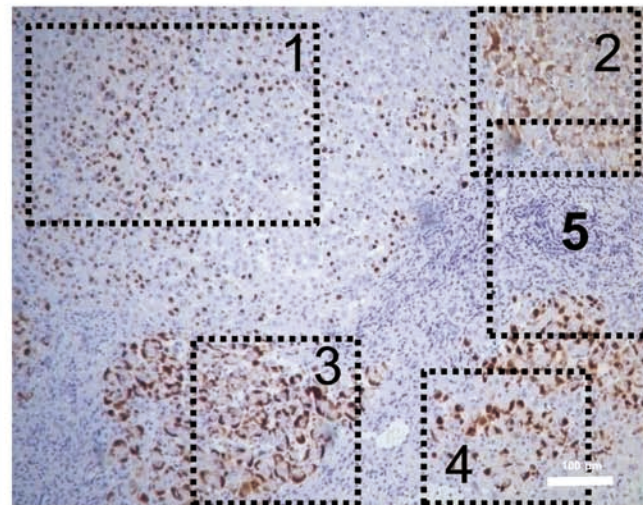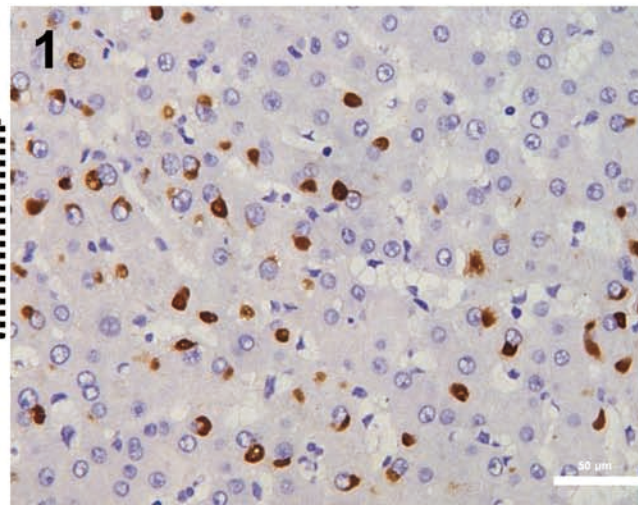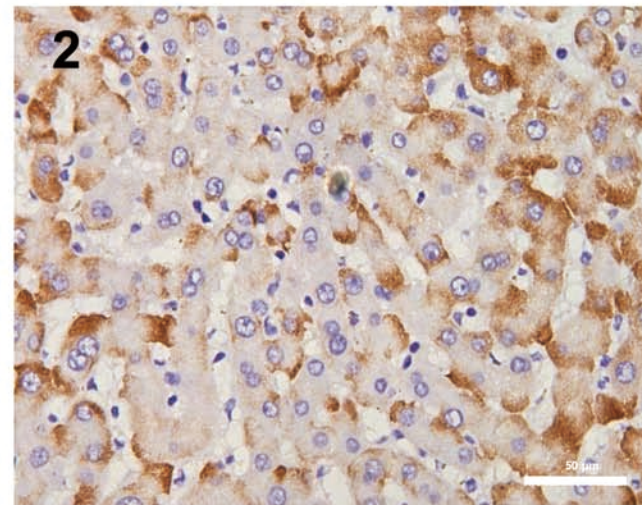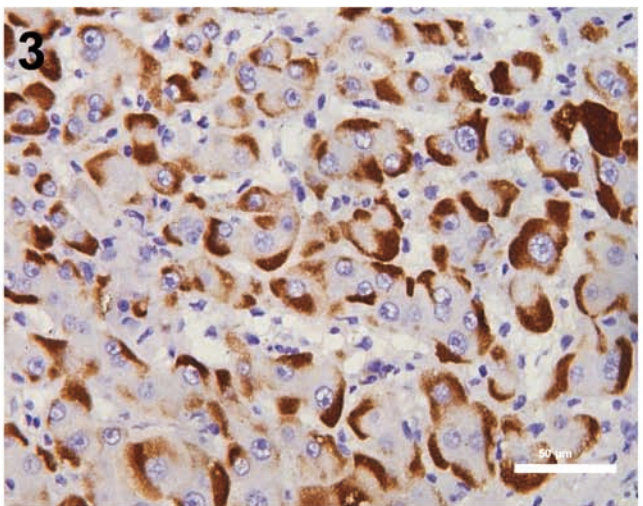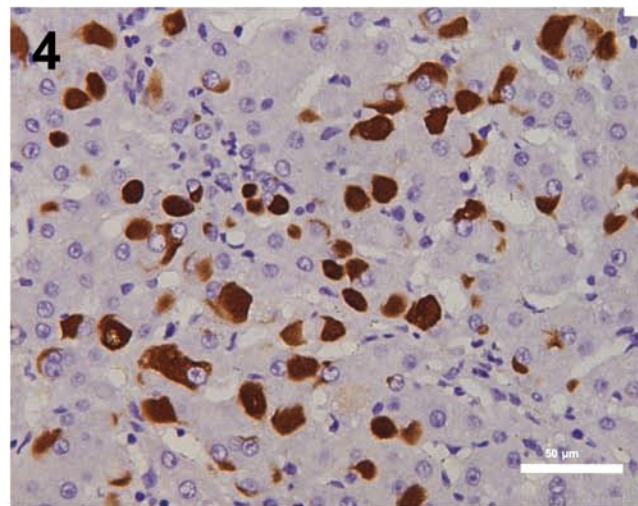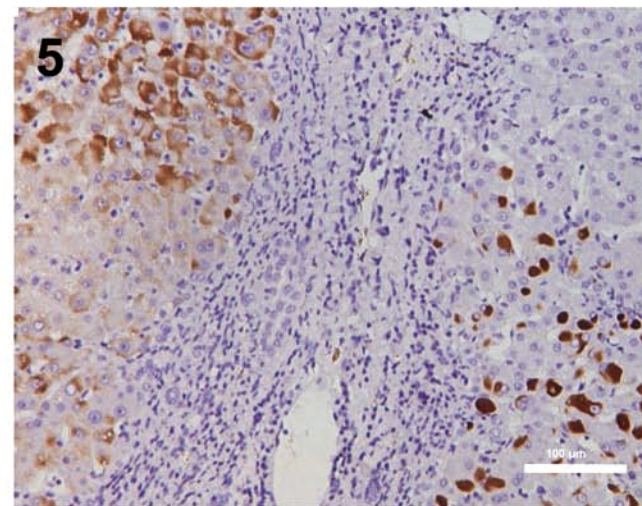

Supplement: mmc2.pdf [file mmc2.pdf]

# Serological HBsAg

Positive

Negative

**A**

x10

x40

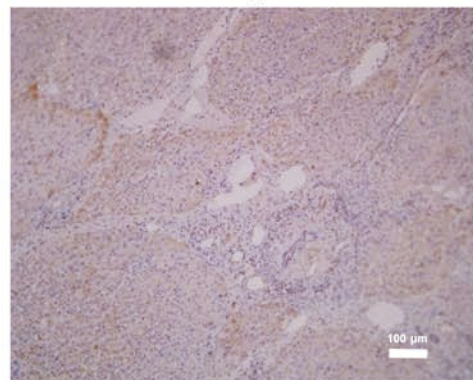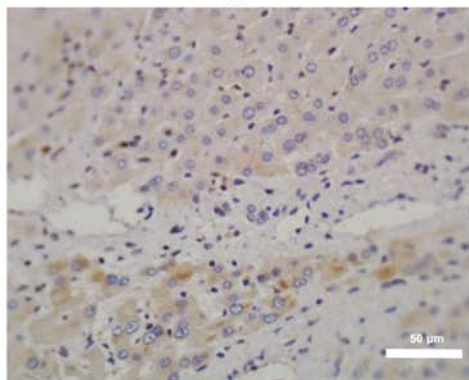

**B**

x10

x40

13#

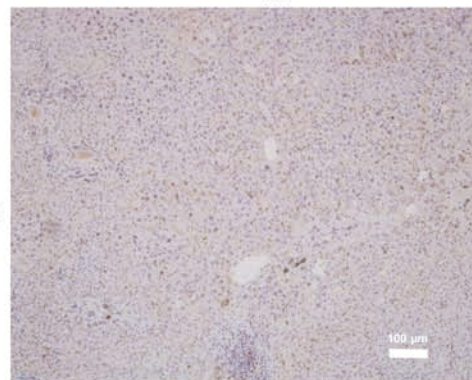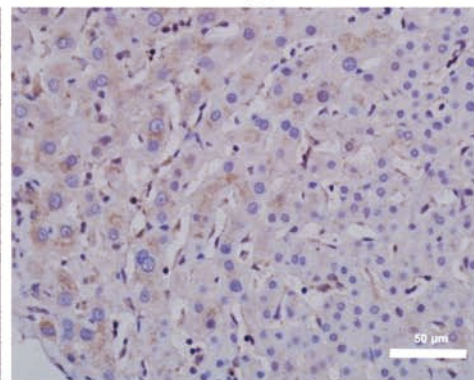

12#

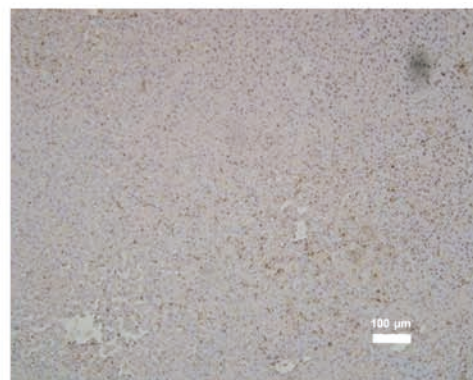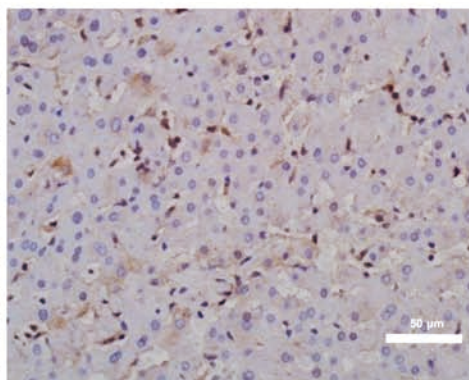

14#

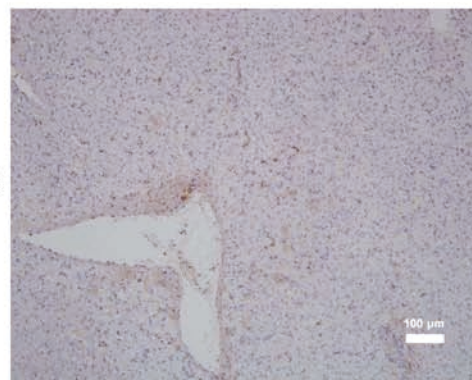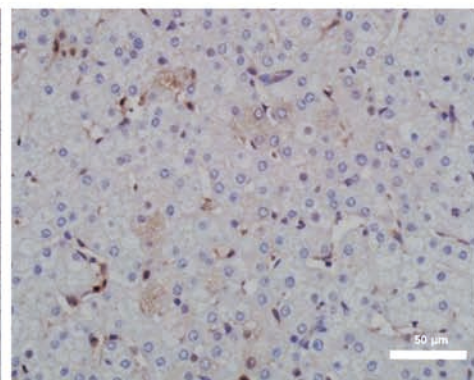

Supplement: mmc3.pdf [file mmc3.pdf]
